# Supplementary material for: Spartan: A Comprehensive Tool for Understanding Uncertainty in Simulations of Biological Systems
Source: PLOS journal article supplement (doi:10.1371/journal.pcbi.1002916), 2013-02-28

**LHC Analysis for Parameter: maxVCAMEffectProbabilityCutoff**

**Measure: Velocity**

**Correlation Coefficient:  $-0.966$**

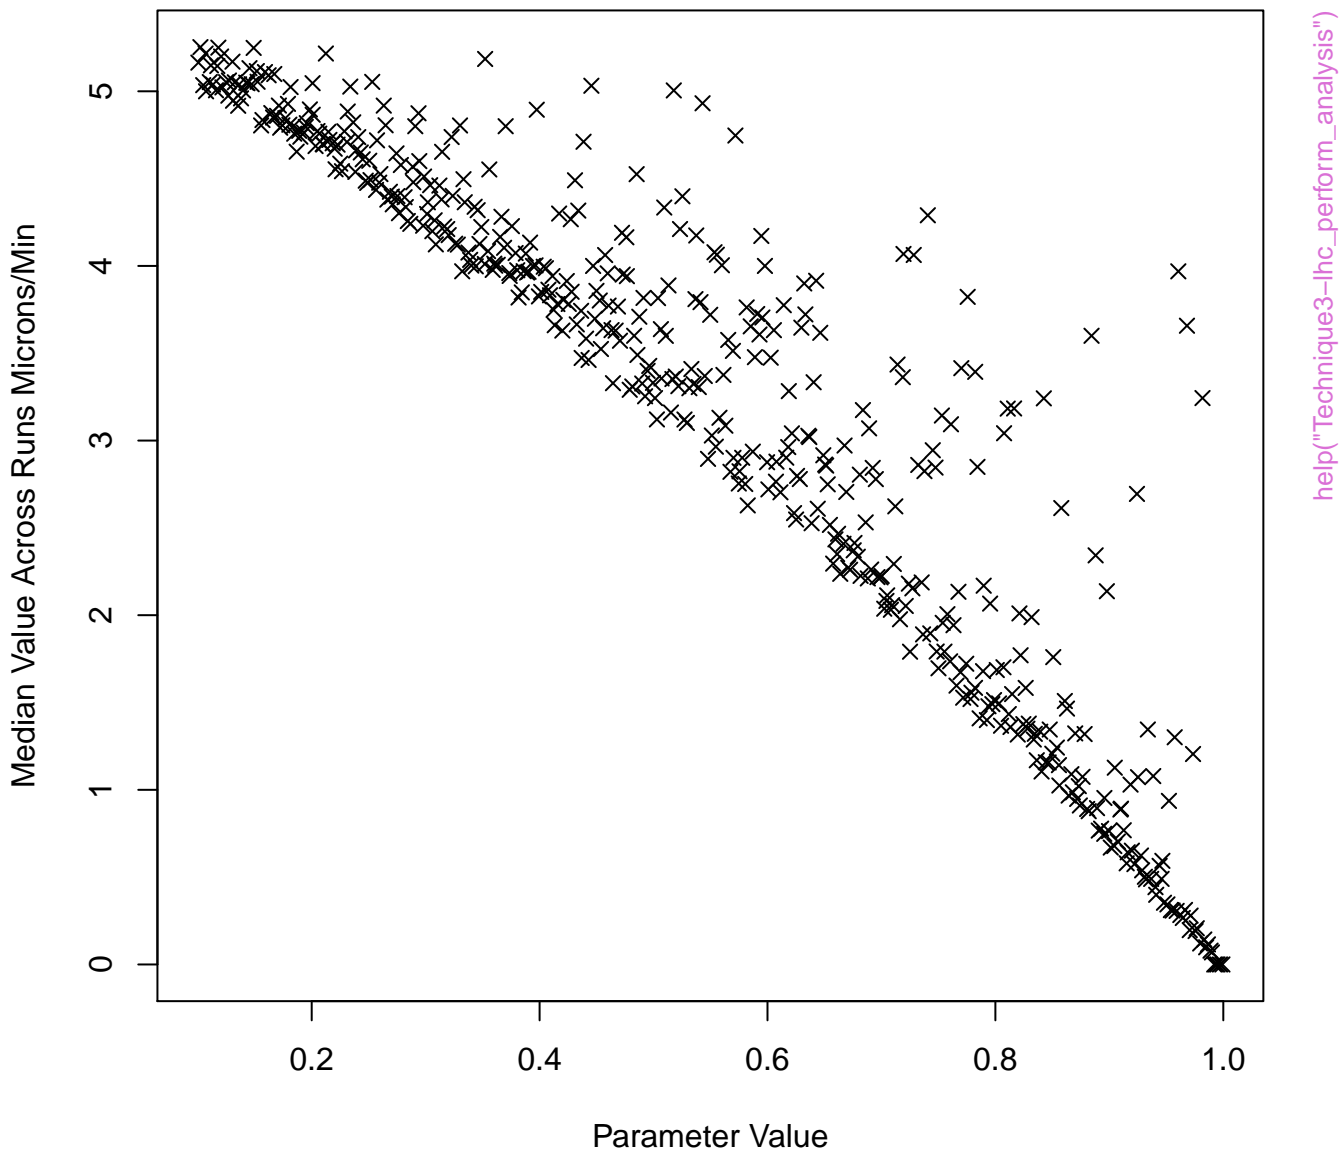

Supplement: S1 (10.1371/journal.pcbi.1002916.s001) [file journal.pcbi.1002916.s001]
