# Supplementary figures and images for: Spartan: A Comprehensive Tool for Understanding Uncertainty in Simulations of Biological Systems
Source: PLOS journal article supplement (doi:10.1371/journal.pcbi.1002916), 2013-02-28

Partitioning of Variance in Simulation Results using eFAST  
Measure: Displacement

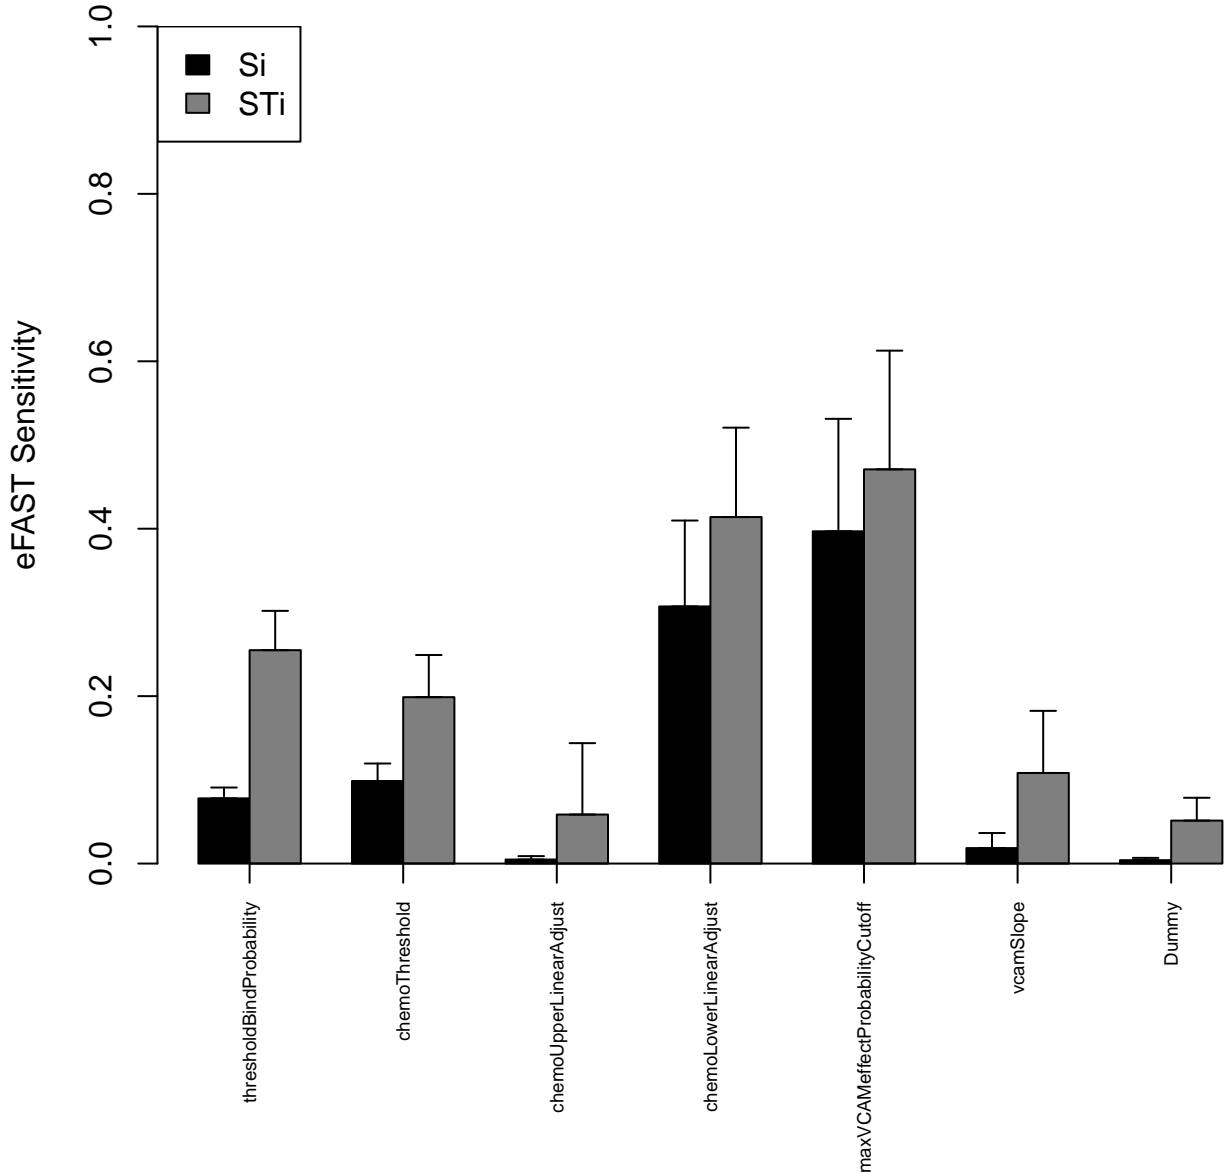

Supplement: S1 (10.1371/journal.pcbi.1002916.s001) [file journal.pcbi.1002916.s001]

# A-Test Scores when adjusting parameter chemoLowerLinearAdjust

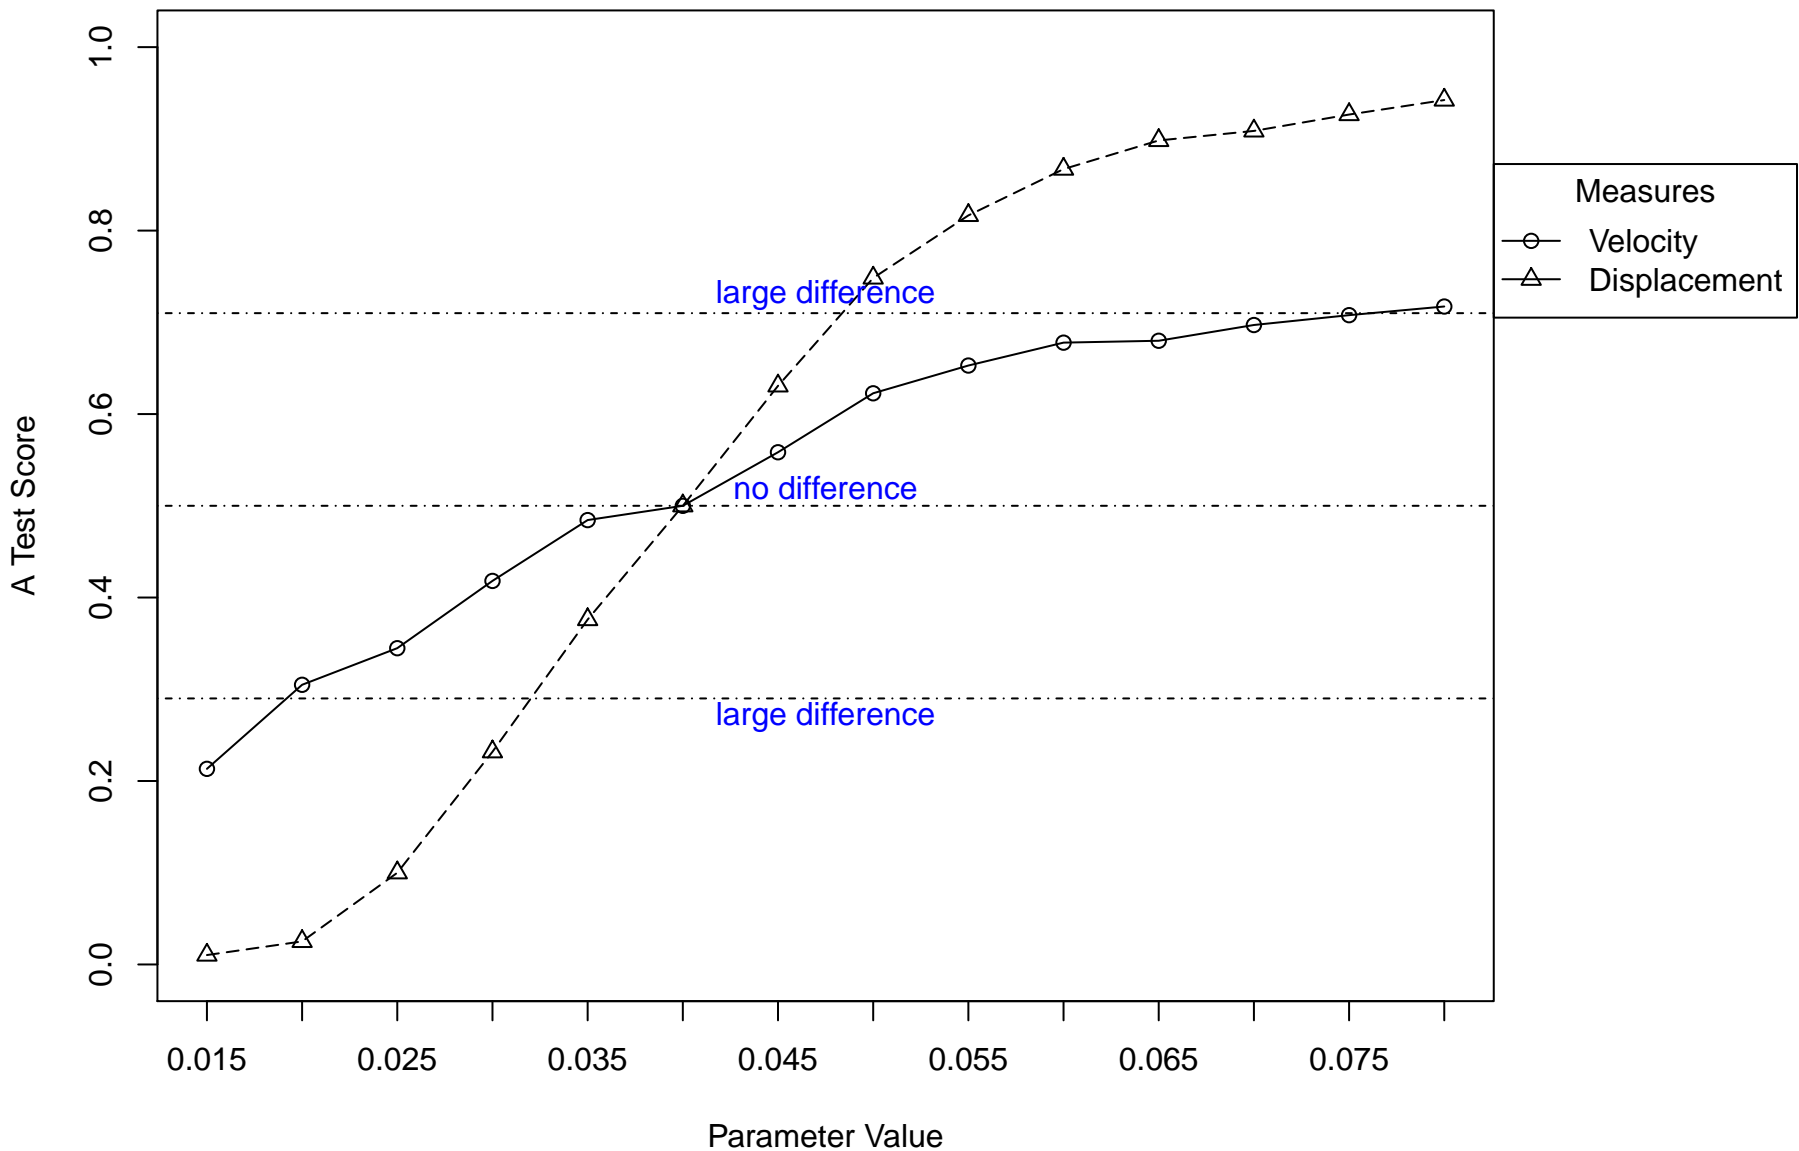

Supplement: S1 (10.1371/journal.pcbi.1002916.s001) [file journal.pcbi.1002916.s001]

Partitioning of Variance in Simulation Results using eFAST  
Measure: Velocity

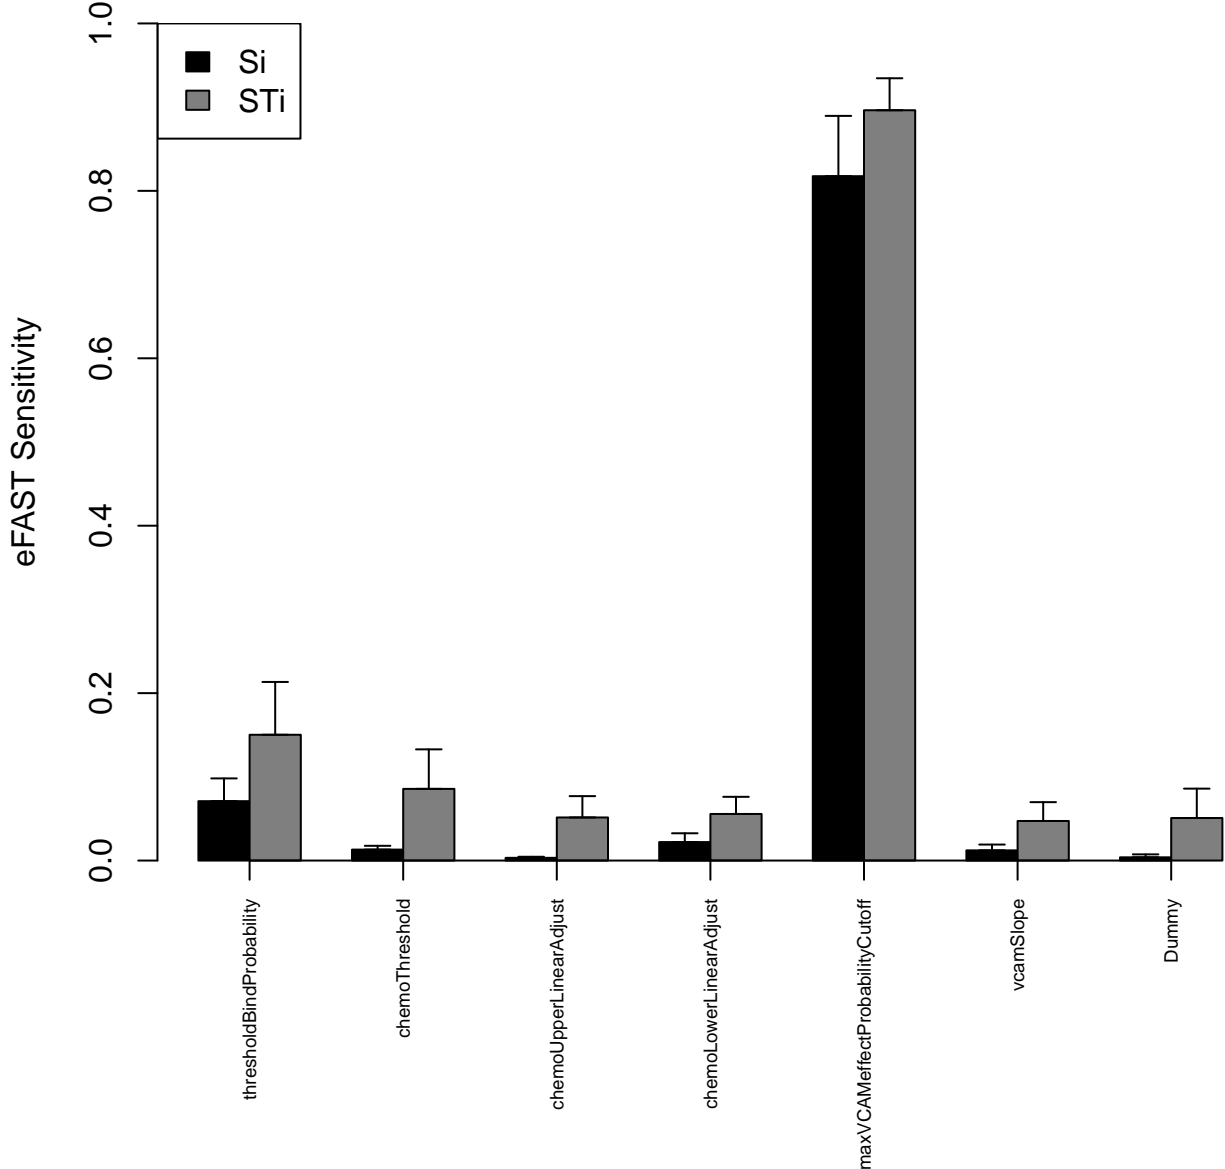

Supplement: S1 (10.1371/journal.pcbi.1002916.s001) [file journal.pcbi.1002916.s001]

# A-Test Scores when adjusting parameter chemoUpperLinearAdjust

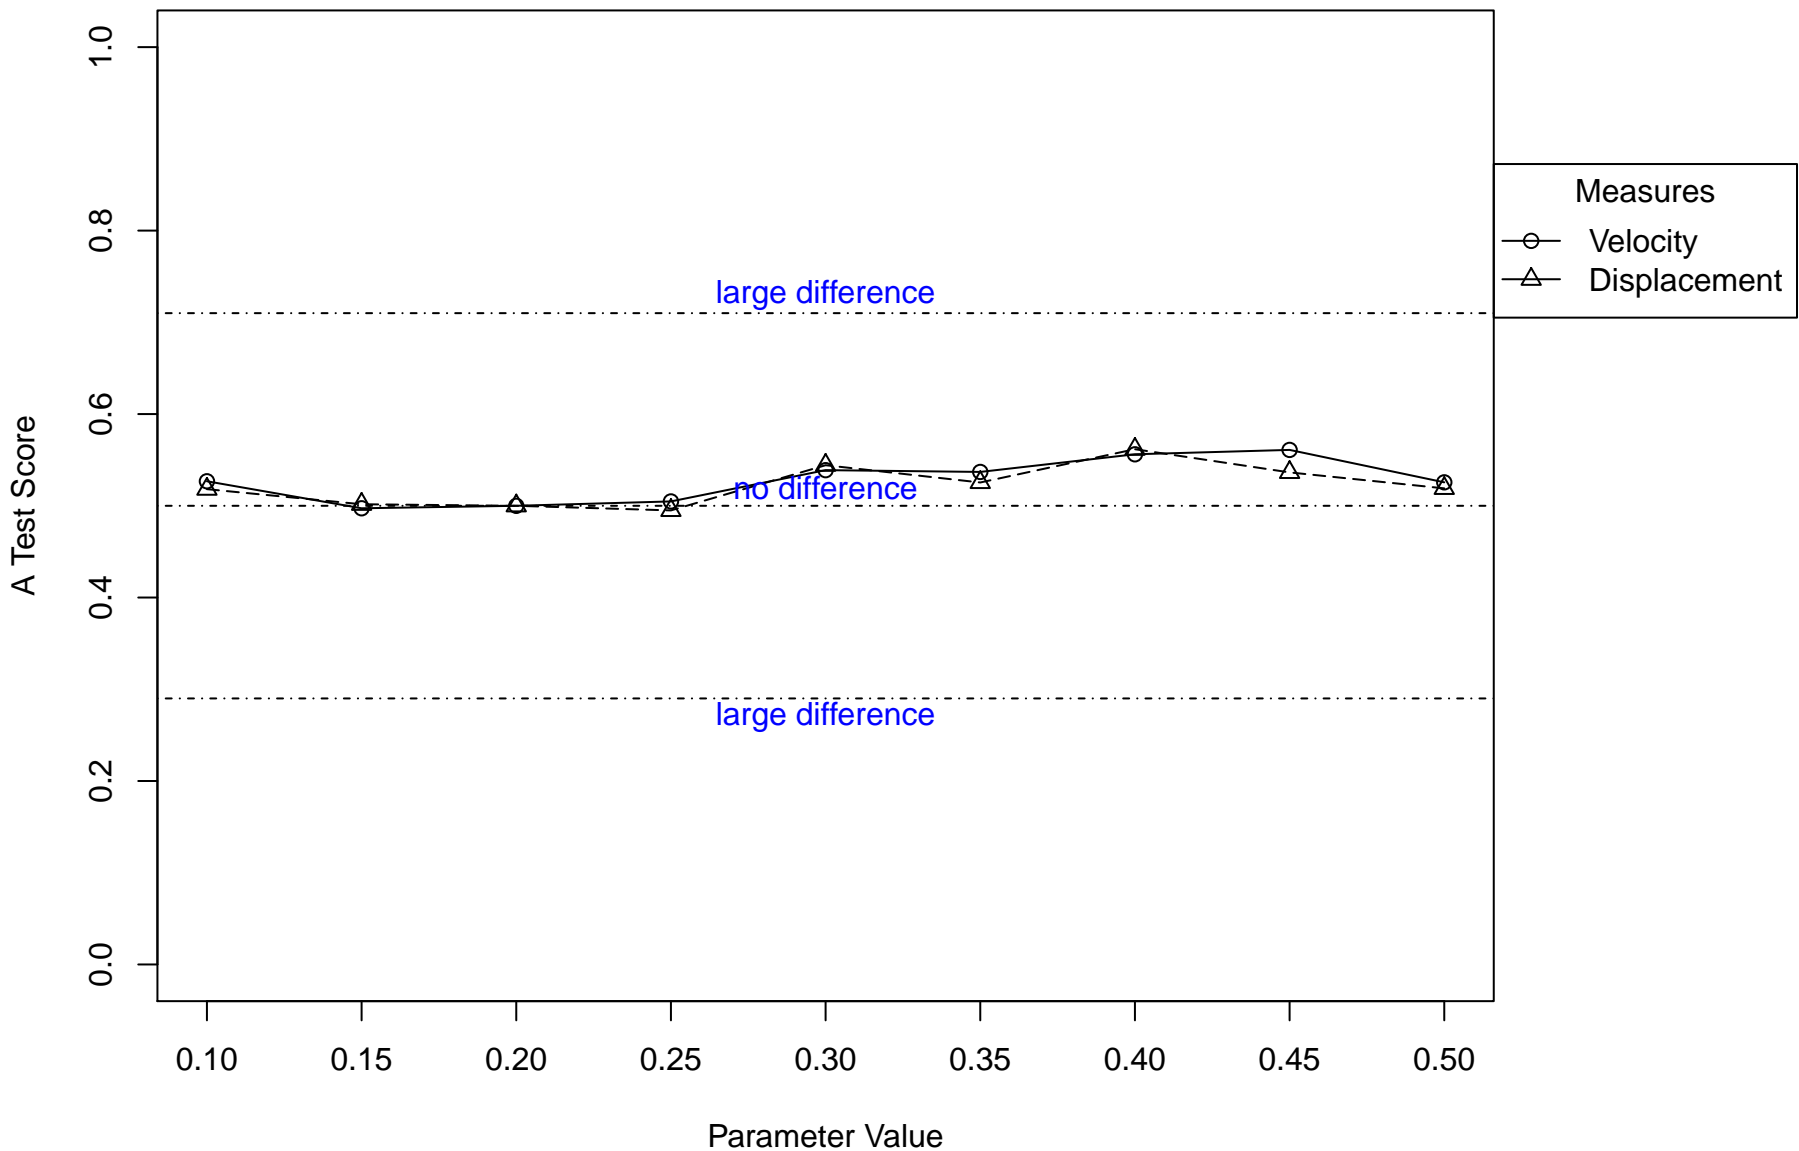

Supplement: S1 (10.1371/journal.pcbi.1002916.s001) [file journal.pcbi.1002916.s001]

# A-Test Scores for 20 Dummy Parameters where Sample Size = 5

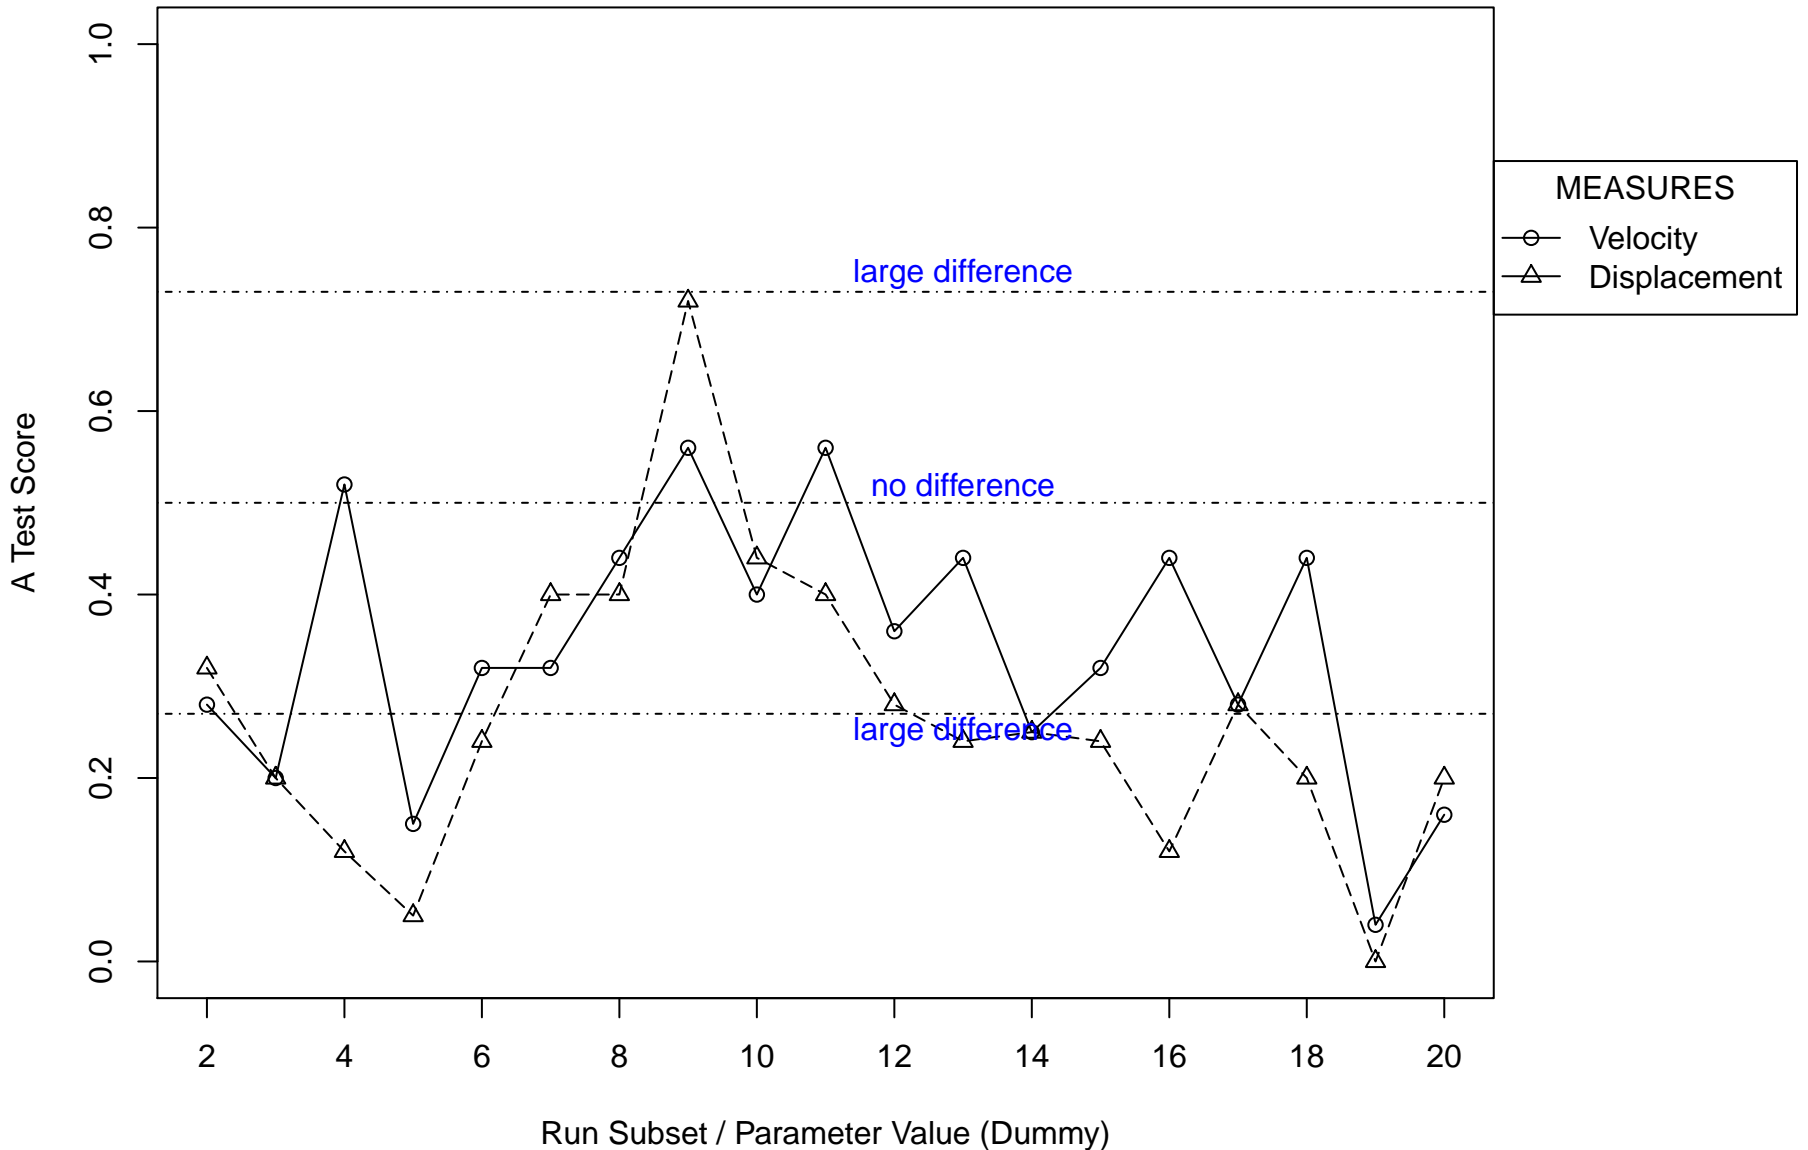

Supplement: S1 (10.1371/journal.pcbi.1002916.s001) [file journal.pcbi.1002916.s001]

Maximum A-Test Scores for each Sample Size

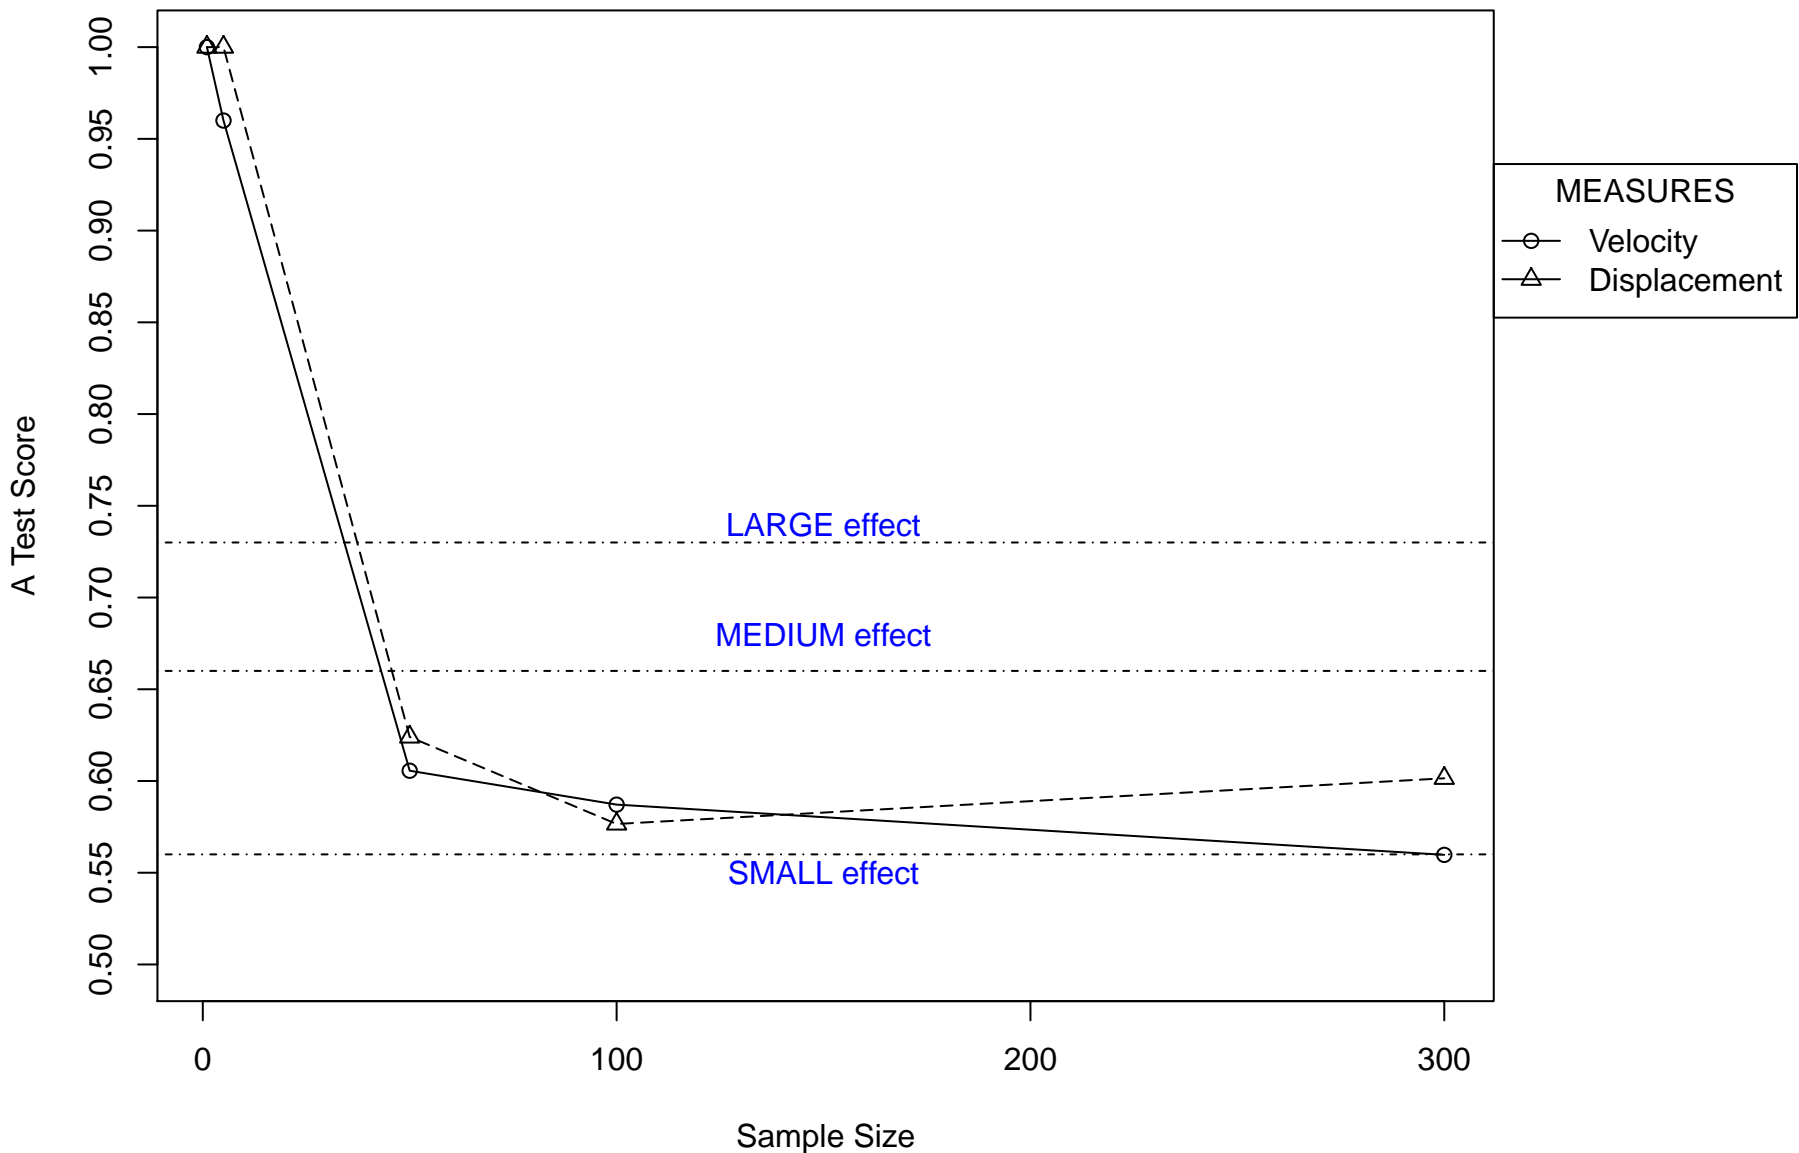

Supplement: S1 (10.1371/journal.pcbi.1002916.s001) [file journal.pcbi.1002916.s001]

# LHC Analysis for Parameter: chemoThreshold

Measure: Velocity

Correlation Coefficient:  $-0.235$

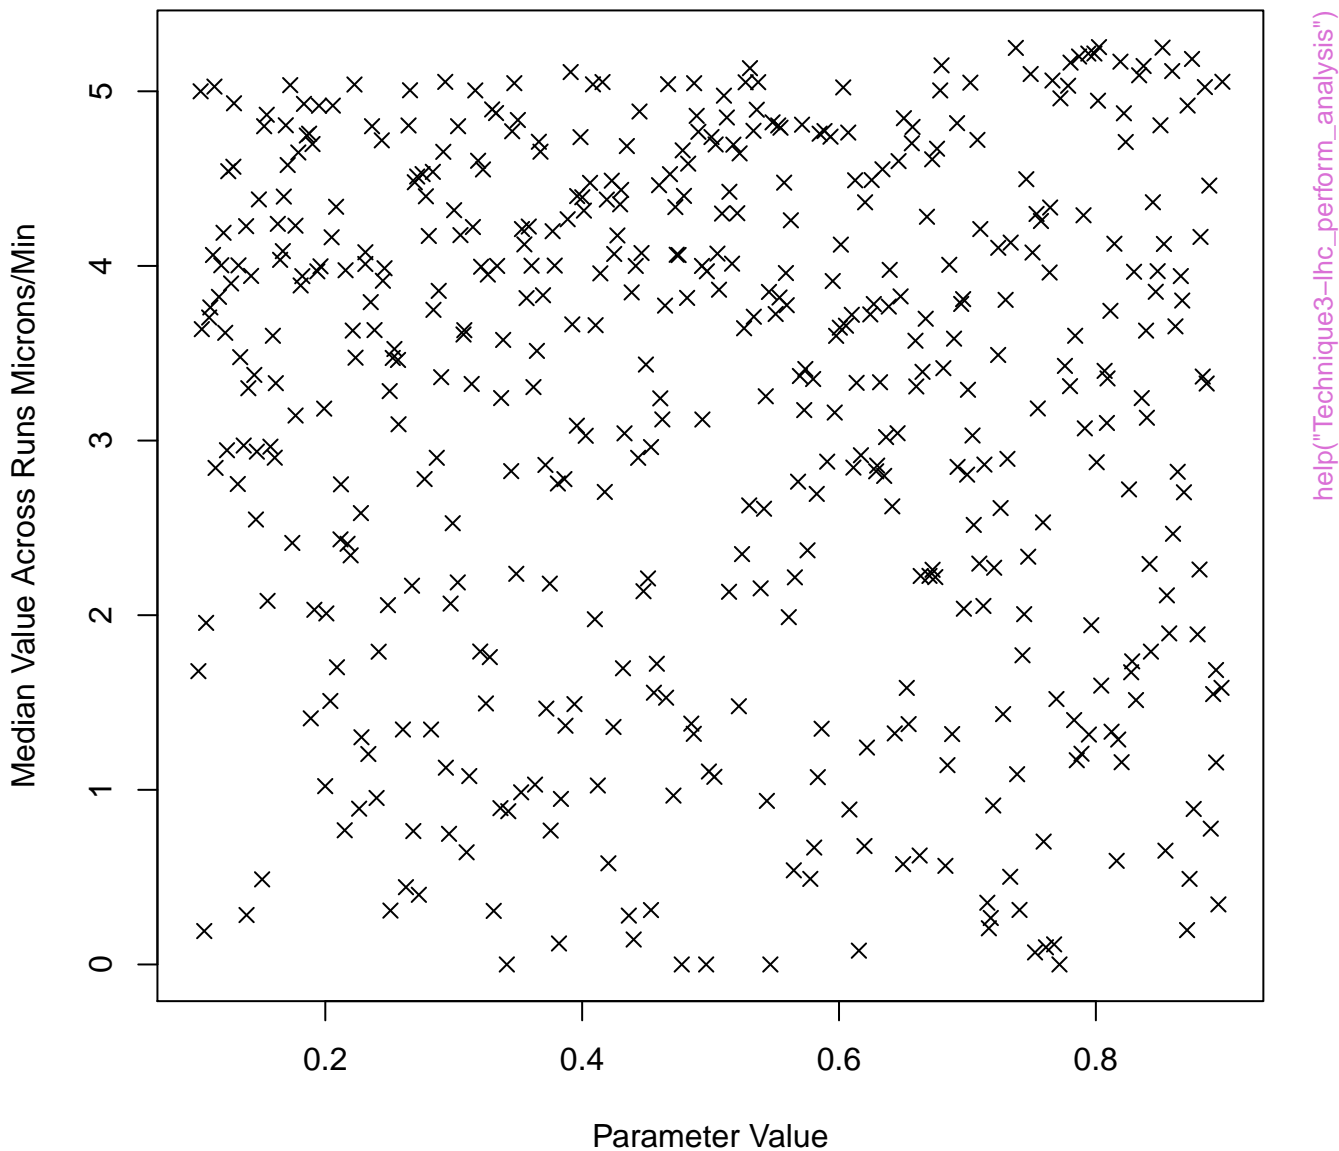

Supplement: S1 (10.1371/journal.pcbi.1002916.s001) [file journal.pcbi.1002916.s001]

**Distribution of Displacement Responses  
when altering parameter chemoLowerLinearAdjust**

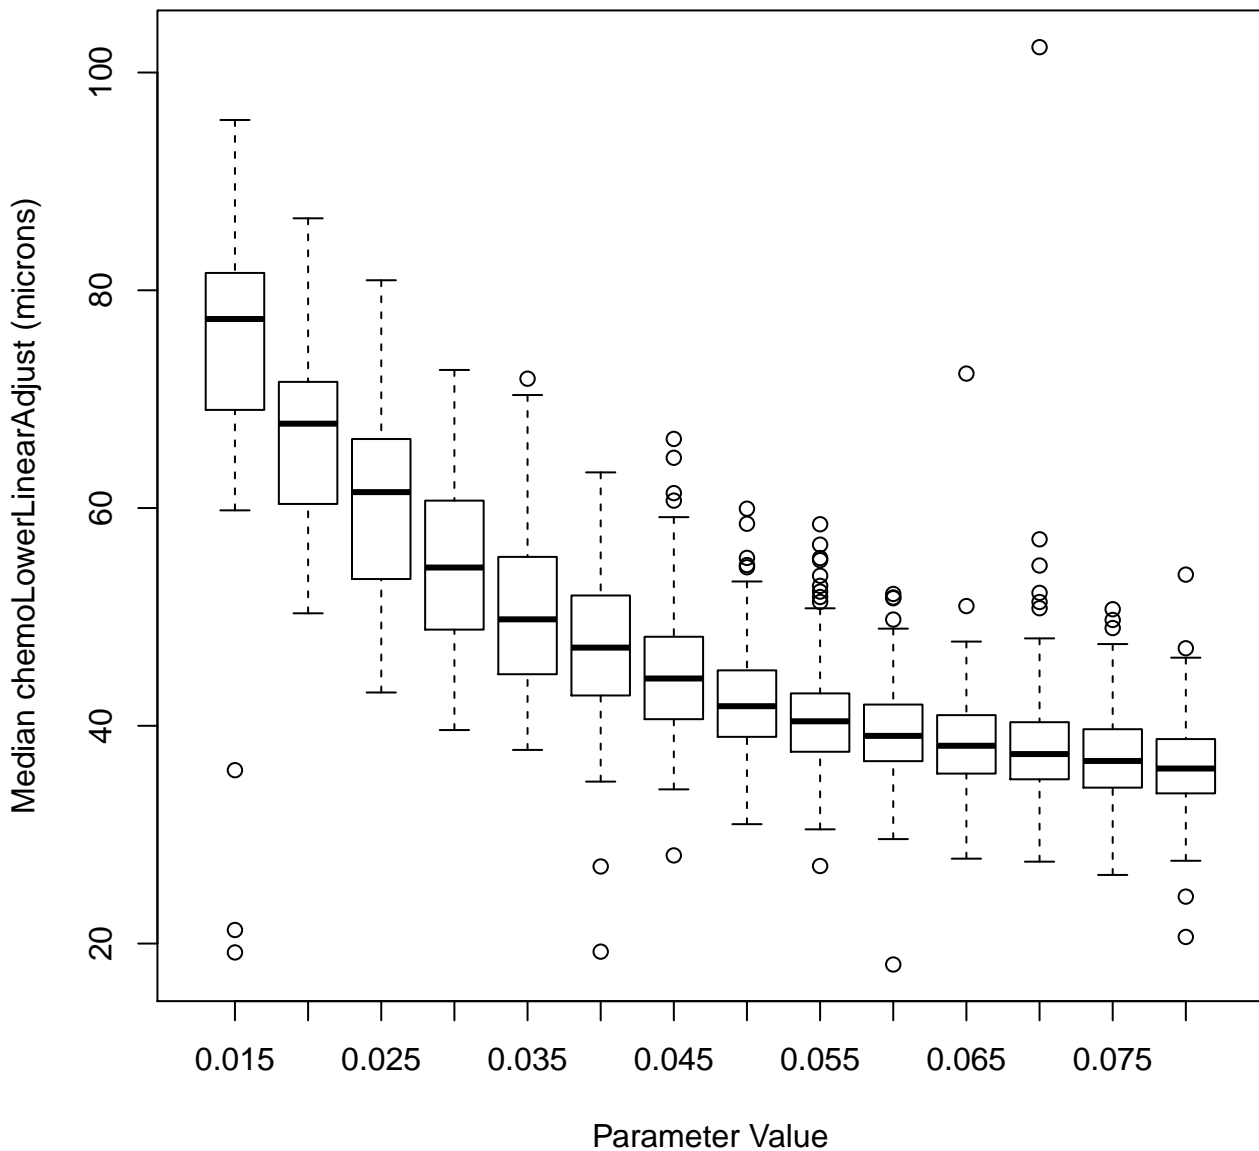

Supplement: S1 (10.1371/journal.pcbi.1002916.s001) [file journal.pcbi.1002916.s001]
